# Supplementary material for: Impact of ILD-Specific Therapies on Perioperative Course in Patients with Progressive Interstitial Lung Disease Undergoing Lung Transplantation
Source: MDPI journal article supplement (doi:10.3390/jcm12154996), 2023-07-29

# Supplemental Material

## Impact of ILD-specific therapies on perioperative course in patients with progressive interstitial lung disease undergoing lung transplantation

**Table S1.** End-stage ILD of the study cohort and concomitant immunosuppressive and/or antifibrotic therapy prior to LTx.

|                                                                         | All<br>(n=286) | Idiopathic<br>pulmonary fi-<br>brosis<br>(n= 116) | Hypersensitivity<br>pneumonitis<br>(n=65) | unclassified<br>pulmonary<br>fibrosis<br>(n=20) | Non-spe-<br>cific inter-<br>stitial<br>pneumonia<br>(n=37) | Connective<br>tissue dis-<br>ease-associ-<br>ated ILD<br>(n=31) | Rare<br>ILDs*<br>(n=17) |
|-------------------------------------------------------------------------|----------------|---------------------------------------------------|-------------------------------------------|-------------------------------------------------|------------------------------------------------------------|-----------------------------------------------------------------|-------------------------|
| Pirfenidone, n (%)                                                      | 45 (12.9)      | 38 (32.8)                                         | 2 (3.1)                                   | 0 (0.0)                                         | 2 (5.4)                                                    | 0 (0.0)                                                         | 3 (17.6)                |
| Nintedanib, n (%)                                                       | 37 (15.7)      | 32 (27.6)                                         | 1 (1.5)                                   | 2 (10.0)                                        | 0 (0.0)                                                    | 1 (3.2)                                                         | 1 (5.9)                 |
| Combination of antifibrotics with immuno-<br>suppressive drugs, n (%)** | 33 (11.5)      | 12 (10.3)                                         | 7 (10.8)                                  | 5 (25.0)                                        | 2 (5.4)                                                    | 6 (19.4)                                                        | 1 (5.9)                 |
| Corticosteroid monotherapy, n (%)                                       | 80 (28.0)      | 19 (16.4)                                         | 22 (33.8)                                 | 8 (40.0)                                        | 17 (45.9)                                                  | 10 (32.3)                                                       | 4 (23.5)                |
| Corticosteroids + MMF, n (%)                                            | 26 (9.1)       | 4 (3.4)                                           | 10 (15.4)                                 | 0 (0.0)                                         | 6 (16.2)                                                   | 6 (19.4)                                                        | 0 (0.0)                 |
| Corticosteroids + AZA, n (%)                                            | 32 (11.2)      | 3 (2.6)                                           | 18 (27.7)                                 | 0 (0.0)                                         | 7 (18.9)                                                   | 4 (12.9)                                                        | 0 (0.0)                 |
| Immunosuppressive monotherapy,<br>n (%)***                              | 9 (3.1)        | 0 (0.0)                                           | 2 (3.1)                                   | 0 (0.0)                                         | 2 (5.4)                                                    | 3 (9.7)                                                         | 2 (11.8)                |
| w/o specific treatment                                                  | 24 (8.4)       | 8 (6.9)                                           | 3 (4.6)                                   | 5 (25.0)                                        | 1 (2.7)                                                    | 1 (3.2)                                                         | 6 (35.3)                |

Definition of abbreviations: AZA, azathioprine; ILD, interstitial lung disease; MMF, mycophenolate mofetil. \* Respiratory bronchiolitis-interstitial lung disease, eosinophilic pneumonia, acute interstitial pneumonia, desquamative interstitial pneumonia \*\* Combination of antifibrotics with corticosteroid ± mycophenolate mofetil or ± azathioprine. \*\*\* MMF or methotrexate or AZA.

**Table S2.** Comorbidities assessed during transplant evaluation.

|                                                                         | All<br>(n=286) | Antifibrotic<br>monotherapy<br>(n= 82) | antifibrotic treat-<br>ment + immunosup-<br>pressive drugs<br>(n=33) | Immuno-sup-<br>pressive ther-<br>apy<br>(n=147) | w/o specific<br>treatment<br>(n=24) | p-value      |
|-------------------------------------------------------------------------|----------------|----------------------------------------|----------------------------------------------------------------------|-------------------------------------------------|-------------------------------------|--------------|
| Arterial hypertension, n (%)                                            | 91 (31.8)      | 29 (35.4)                              | 10 (30.3)                                                            | 44 (29.9)                                       | 8 (33.3)                            | 0.848        |
| Diabetes mellitus, n (%)                                                | 28 (9.8)       | 6 (7.3)                                | 2 (6.1)                                                              | 15 (10.2)                                       | 5 (20.8)                            | 0.251        |
| Hyperlipoproteinemia, n (%)                                             | 35 (12.2)      | 14 (17.1)                              | 4 (12.1)                                                             | 13 (8.8)                                        | 4 (16.7)                            | 0.243        |
| Coronary artery disease, n (%)                                          | 58 (20.3)      | 24 (29.3)                              | 4 (12.1)                                                             | 28 (19.0)                                       | 2 (8.3)                             | 0.063        |
| History of revascularization, n (%)                                     | 33 (11.5)      | 18 (22.0)                              | 1 (3.0)                                                              | 12 (8.2)                                        | 2 (8.3)                             | <b>0.007</b> |
| Connective tissue disease-related in-<br>terstitial lung disease, n (%) | 31 (10.8)      | 1 (1.2)                                | 6 (18.2)                                                             | 23 (15.6)                                       | 1 (4.2)                             | <0.001       |
| Systemic sclerosis, n (%)                                               | 13 (4.9)       | 0 (0.0)                                | 1 (16.7)                                                             | 11 (47.8)                                       | 1 (100.0)                           | <0.001       |
| Osteoporosis, n (%)                                                     | 23 (8.0)       | 6 (7.3)                                | 2 (6.1)                                                              | 13 (8.8)                                        | 2 (8.3)                             | 0.985        |
| Obstructive sleep apnea syndrome, n<br>(%)                              | 21 (7.3)       | 7 (8.5)                                | 4 (12.1)                                                             | 10 (6.8)                                        | 0 (0.0)                             | 0.370        |
| Gastroesophageal reflux disease, n (%)                                  | 35 (12.2)      | 11 (13.4)                              | 4 (12.1)                                                             | 16 (10.9)                                       | 4 (16.7)                            | 0.792        |
| Atrial fibrillation, n (%)                                              | 12 (4.2)       | 2 (2.4)                                | 1 (3.0)                                                              | 7 (4.8)                                         | 2 (8.3)                             | 0.554        |
| Acetylsalicylic acid, n (%)                                             | 78 (27.3)      | 38 (46.3)                              | 6 (18.2)                                                             | 26 (17.7)                                       | 8 (33.3)                            | <0.001       |
| Vitamin K antagonist, n (%)                                             | 25 (8.7)       | 5 (6.1)                                | 3 (9.1)                                                              | 16 (10.9)                                       | 1 (4.2)                             | 0.629        |

Data are presented as number and percentage, respectively.

**Figure S1.** Kaplan–Meier survival in patients undergoing lung transplantation with different previous treatment regimens.

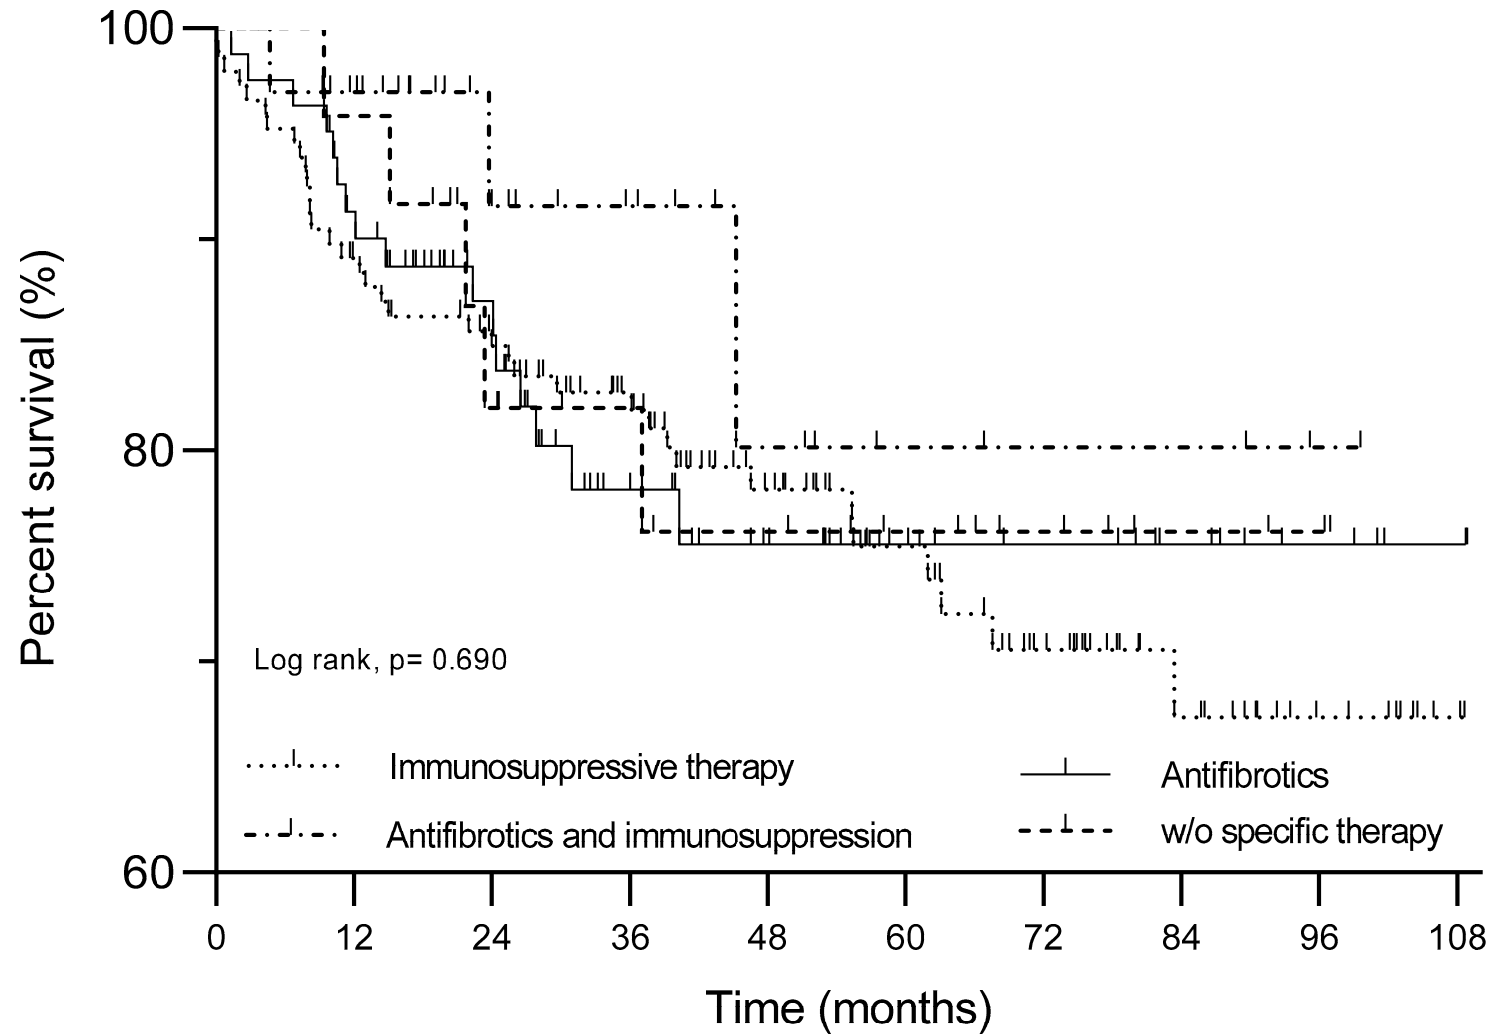

Supplement: s1 [file s1]
